# Supplementary material
Source: HighWire-hosted journal article supplement (https://cmaj.ca/highwire/filestream/59671/field_highwire_adjunct_files/0/160369-com-1-at.pdf)
Supplement: 160369-com-1-at.pdf [file 160369-com-1-at.pdf]

## **Appendix 1 (as supplied by the authors): International treaty provisions complicating the legalization of marijuana**

### ***Single Convention on Narcotic Drugs (1961)***

Article 4(c): Subject to the provisions of this Convention, to limit exclusively to medical and scientific purposes the production, manufacture, export, import, distribution of, trade in, use and possession of drugs.

Article 28(3): The Parties shall adopt such measures as may be necessary to prevent the misuse of, and illicit traffic in, the leaves of the cannabis plant.

Article 36(1)(a): Subject to its constitutional limitations, each Party shall adopt such measures as will ensure that cultivation, production, manufacture, extraction, preparation, possession, offering, offering for sale, distribution, purchase, sale, delivery on any terms whatsoever, brokerage, dispatch, dispatch in transit, transport, importation and exportation of drugs contrary to the provisions of this Convention, and any other action which in the opinion of such Party may be contrary to the provisions of this Convention, shall be punishable offences when committed intentionally, and that serious offences shall be liable to adequate punishment particularly by imprisonment or other penalties of deprivation of liberty.

Article 36(1)(b): Notwithstanding the preceding subparagraph, when abusers of drugs have committed such offences, the Parties may provide, either as an alternative to conviction or punishment or in addition to conviction or punishment, that such abusers shall undergo measures of treatment, education, after-care, rehabilitation and social reintegration in conformity with paragraph 1 of Article 38.

### ***Convention against Illicit Traffic in Narcotic Drugs and Psychotropic Substances (1988)***

Article 3(2): Subject to its constitutional principles and the basic concepts of its legal system, each Party shall adopt such measures as may be necessary to establish as a criminal offence under its domestic law, when committed intentionally, the possession, purchase or cultivation of narcotic drugs or psychotropic substances for personal consumption contrary to the provisions of the 1961 Convention, the 1961 Convention as amended or the 1971 Convention.
